# Supplementary material for: Predicting extent of resection in transsphenoidal surgery for pituitary adenoma
Source: Springer Nature journal article supplement (doi:10.1007/s00701-018-3690-x), 2018-09-29
Supplement: MOESM1 [file 16162070]

**Supplementary Table 1** Surgical results at 3 months follow up. Values are given separately for both the derivation and validation cohort.

| **Characteristic** | **Derivation Cohort**  **(n = 96)** | **Validation Cohort**  **(n = 20)** |
| --- | --- | --- |
| Gross total resection, n (%) | 67 (70) | 14 (70) |
| Extent of resection (%) |  |  |
| Median (IQR) | 100 (98.7 – 100) | 100 (98.1 – 100) |
| Mean ± SD | 97.3 ± 8.9 | 97.4 ± 4.9 |
| Volume at 3 months, [cm3] |  |  |
| Median (IQR) | 0.0 (0.0 – 0.09) | 0.0 (0.0 – 0.19) |
| Mean ± SD | 0.31 ± 1.75 | 0.19 ± 0.45 |
| Residual tumor in CSS, n (%) | 21 (22) | 2 (10) |
| Endocrinological remission, n (%) | 21/30 (70) | 3/3 (100) |

IQR, interquartile range; SD, standard deviation; CSS, cavernous sinus space.
